# Supplementary material for: Visceral fat adipocytes from obese and colorectal cancer subjects exhibit distinct secretory and ω6 polyunsaturated fatty acid profiles and deliver immunosuppressive signals to innate immunity cells
Source: PubMed Central journal article supplement (PMC5325349; doi:10.18632/oncotarget.10998), 2016-08-01
Supplement: oncotarget-07-63093-s001.pdf [file oncotarget-07-63093-s001.pdf]

## Visceral fat adipocytes from obese and colorectal cancer subjects exhibit distinct secretory and $\omega 6$ polyunsaturated fatty acid profiles and deliver immunosuppressive signals to innate immunity cells

### Supplementary Materials

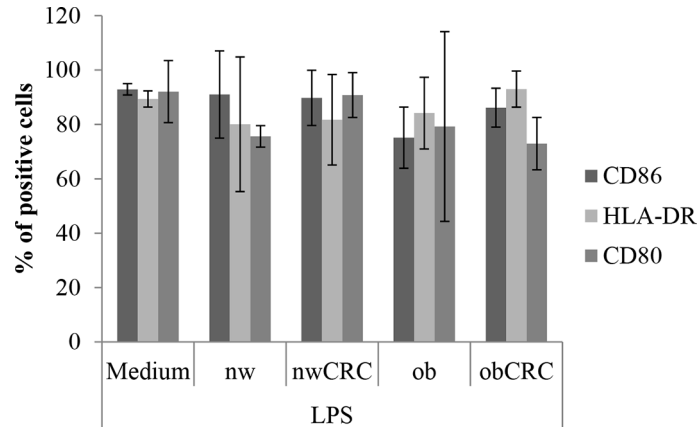

**Supplementary Figure S1: Adipocyte microenvironment does not alter DC phenotypic maturation.** 5-day-cultured control DC (Medium), nw ( $n=6$ ), ob ( $n=6$ ), nwCRC ( $n=4$ ) and obCRC ( $n=4$ )–ACM DC were treated with LPS (10 ng/ml) for 24 hours. Cells were stained with CD80, CD86 and HLA-DR and analyzed by flow cytometry. Data are shown as means of the percentage of positive cells  $\pm$  SEM.

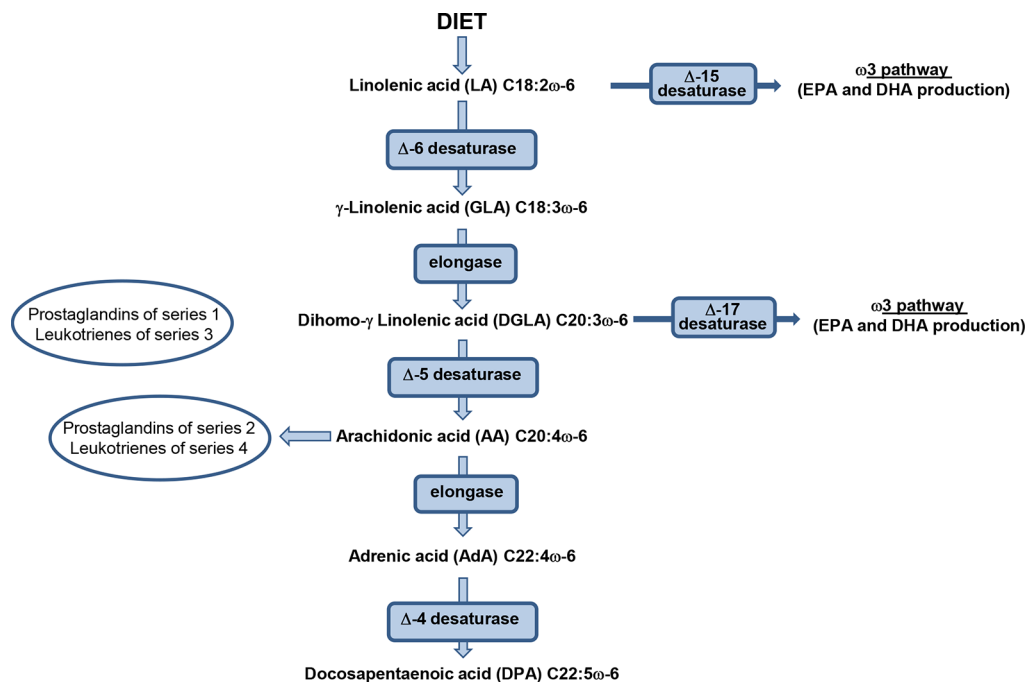

**Supplementary Figure S2: Pathway of biosynthesis of  $\omega 6$  PUFAs.** The metabolic pathway of  $\omega 6$  PUFAs generates different metabolites with pro- or anti-inflammatory activities. The involvement of LA and DGLA in  $\omega 3$  PUFAs metabolism is indicated.
